RESEARCH ARTICLE

# Delays before Diagnosis and Initiation of Treatment in Patients Presenting to Mental Health Services with Bipolar Disorder

Rashmi Patel<sup>1\*</sup>, Hitesh Shetty<sup>2</sup>, Richard Jackson<sup>3</sup>, Matthew Broadbent<sup>2</sup>, Robert Stewart<sup>3</sup>, Jane Boydell<sup>1</sup>, Philip McGuire<sup>1</sup>, Matthew Taylor<sup>1</sup>

**1** King's College London, Department of Psychosis Studies, Institute of Psychiatry, Psychology & Neuroscience, London, United Kingdom, **2** South London and Maudsley NHS Foundation Trust, Biomedical Research Centre Nucleus, London, United Kingdom, **3** King's College London, Department of Psychological Medicine, Institute of Psychiatry, Psychology & Neuroscience, London, United Kingdom

\* [plosone@rpatel.co.uk](mailto:plosone@rpatel.co.uk)

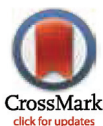

OPEN ACCESS

**Citation:** Patel R, Shetty H, Jackson R, Broadbent M, Stewart R, Boydell J, et al. (2015) Delays before Diagnosis and Initiation of Treatment in Patients Presenting to Mental Health Services with Bipolar Disorder. PLoS ONE 10(5): e0126530. doi:10.1371/journal.pone.0126530

**Academic Editor:** Gabriel Alejandro de Erausquin, University of South Florida, UNITED STATES

**Received:** November 10, 2014

**Accepted:** April 2, 2015

**Published:** May 20, 2015

**Copyright:** © 2015 Patel et al. This is an open access article distributed under the terms of the [Creative Commons Attribution License](https://creativecommons.org/licenses/by/4.0/), which permits unrestricted use, distribution, and reproduction in any medium, provided the original author and source are credited.

**Data Availability Statement:** The ethical approval to access CRIS data (Oxfordshire Research Ethics Committee C 08/H0606/71+5) requires the data to be stored behind an NHS firewall with access governed by a patient-led oversight committee. For this reason, the data cannot be made available in the manuscript, Supporting Information files or a public repository. However, subject to approval from the oversight committee, data access for research purposes is possible by contacting Robert Stewart ([robert.stewart@kcl.ac.uk](mailto:robert.stewart@kcl.ac.uk)) who is the academic lead for the CRIS data resource.

## Abstract

### Background

Bipolar disorder is a significant cause of morbidity and mortality. Although existing treatments are effective, there is often a substantial delay before diagnosis and treatment initiation. We sought to investigate factors associated with the delay before diagnosis of bipolar disorder and the onset of treatment in secondary mental healthcare.

### Method

Retrospective cohort study using anonymised electronic mental health record data from the South London and Maudsley NHS Foundation Trust (SLaM) Biomedical Research Centre (BRC) Case Register on 1364 adults diagnosed with bipolar disorder between 2007 and 2012. The following predictor variables were analysed in a multivariable Cox regression analysis: age, gender, ethnicity, compulsory admission to hospital under the UK Mental Health Act, marital status and other diagnoses prior to bipolar disorder. The outcomes were time to recorded diagnosis from first presentation to specialist mental health services (the diagnostic delay), and time to the start of appropriate therapy (treatment delay).

### Results

The median diagnostic delay was 62 days (interquartile range: 17–243) and median treatment delay was 31 days (4–122). Compulsory hospital admission was associated with a significant reduction in both diagnostic delay (hazard ratio 2.58, 95% CI 2.18–3.06) and treatment delay (4.40, 3.63–5.62). Prior diagnoses of other psychiatric disorders were associated with increased diagnostic delay, particularly alcohol (0.48, 0.33–0.41) and substance misuse disorders (0.44, 0.31–0.61). Prior diagnosis of schizophrenia and psychotic depression were associated with reduced treatment delay.

**Funding:** RP is supported by a Medical Research Council Clinical Research Training Fellowship. All other authors are funded by the National Institute for Health Research (NIHR) Biomedical Research Centre and Dementia Biomedical Research Unit at South London and Maudsley NHS Foundation Trust and King's College London, which also supports the development and maintenance of the CRIS data resource. The funders had no role in study design, data collection and analysis, decision to publish, or preparation of the manuscript.

**Competing Interests:** The authors have read the journal's policy and have the following competing interests: The CRIS team (HS, RJ, MB and RS) have received research funding from Roche, Pfizer, Johnson & Johnson and Lundbeck. PM has received research funding from Janssen, Sunovion, GW and Roche. MT reports personal fees from Bristol-Myers Squibb and Otsuka, outside the submitted work, and a family member is an employee of GlaxoSmithKline. The other authors declare no competing interests. This does not alter the authors' adherence to PLOS ONE policies on sharing data and materials.

## Conclusions

Some individuals experience a significant delay in diagnosis and treatment of bipolar disorder after initiation of specialist mental healthcare, particularly those who have prior diagnoses of alcohol and substance misuse disorders. These findings highlight a need for further study on strategies to better identify underlying symptoms and offer appropriate treatment sooner in order to facilitate improved clinical outcomes, such as developing specialist early intervention services to identify and treat people with bipolar disorder.

## Introduction

Bipolar disorder is a major global health problem, associated with increased mortality[1,2], substantial disability[3], and major societal economic impact[4]. However people with bipolar disorder often experience delays of several years before receiving a diagnosis and appropriate treatment. Retrospective studies from USA and Australia have found that people with bipolar disorder report delays of more than five years, often more than ten years, between the onset of illness and diagnosis[5,6]. Moreover, studies from specialist centres typically find there to have also been substantial delays of many years before initiation of appropriate medication[7–10].

Delayed diagnosis and treatment of bipolar disorder are associated with poorer long term outcomes[8,10,11], and repeated episodes of bipolar disorder are associated with increased vulnerability to relapse[12] and deteriorations in cognitive function[13]. Furthermore, the failure to correctly recognise underlying bipolar disorder may lead to an individual receiving inappropriate treatment such as antidepressant monotherapy which may be associated with increased risk of developing mania[14,15].

One of the barriers to the prompt recognition and management of this group may be a failure to recognise symptoms indicative of underlying bipolar disorder[16], and the attribution of these to another mental illness[17] or comorbid substance misuse[18]. Furthermore, the nature of psychopathology experienced by an individual with bipolar disorder can vary significantly over the course of illness[19]. In the early stages, the pattern of symptoms may not be well characterised by criterion-based ICD/DSM diagnostic classification potentially leading to a delay in receiving appropriate treatment[20].

An improved understanding of factors associated with delay to diagnosis and delay to treatment would inform the development of strategies to reduce them. In the present study, we analysed clinical data from individuals with bipolar disorder in a large geographically-defined community in order to estimate the delay to diagnosis and initiation of appropriate treatment after presentation to mental health services. Our first hypothesis was that even when they are assessed by mental health teams, there are still significant delays before patients with bipolar disorder receive a diagnosis and appropriate treatment. We also investigated the factors associated with delays to diagnosis and treatment, and tested the hypothesis that these delays would be longer in patients who had previously been diagnosed with other mental illnesses or comorbid alcohol and substance misuse.

## Methods

### Participants

Data were obtained from the South London and Maudsley NHS Foundation Trust (SLaM) Biomedical Research Centre Case Register. Under the National Health Service (NHS) system in

the UK, there is universal state provision of healthcare with Mental Health Trusts providing specialist mental healthcare to people living in defined geographic catchment areas[21]. In order to obtain specialist mental healthcare, patients typically consult their local general practitioner (a provider of primary healthcare) who may then initiate a referral to the respective specialist mental healthcare service. Alternatively, patients may be referred to specialist mental healthcare services after presenting to emergency departments and some services accept direct patient referrals. Initial assessments may be performed by a trainee or consultant psychiatrist or other mental healthcare professional[21]. The South London and Maudsley NHS Foundation Trust (SLaM) is one of Europe's largest provider of secondary mental healthcare, serving four boroughs in southeast London (urban and suburban areas) with a geographic catchment of approximately 1.2 million residents and provision of all aspects of secondary mental healthcare to all age groups including inpatient, community, general hospital liaison and forensic services. Fully electronic clinical records have been implemented in all SLaM services since 2007, and an electronic case register (the SLaM BRC Case Register) has been developed by the SLaM BRC for Mental Health rendering anonymised electronic clinic records data available for research on over 250,000 people receiving care from SLaM[22], with a robust patient-led governance framework. The SLaM Case Register has been approved as an anonymised data resource for secondary analyses by Oxfordshire Research Ethics Committee C (08/H0606/71+5) and governance is provided for all projects by a patient-led oversight committee in the Biomedical Research Centre, South London and Maudsley NHS Trust[23].

Using the SLaM BRC Case Register, a cohort of 1364 individuals meeting the following criteria were identified:

- i. First presentation to SLaM between 1<sup>st</sup> January 2007 and 31<sup>st</sup> December 2012 to an inpatient or community mental health service.
- ii. Age between 16 and 65 years at first presentation.
- iii. Subsequent diagnosis of mania or bipolar affective disorder before 31<sup>st</sup> December 2013 defined according to ICD-10 diagnostic categories F30.x and F31.x.

Of these, 344 (25.2%) presented initially to inpatient services and the remainder presented to community services.

In order to ensure that participants included in the analysis had a stable diagnosis of bipolar disorder, only participants whose mania or bipolar disorder diagnosis was confirmed at least once within one year of initial diagnosis were included. The time period of 2007 to 2012 was chosen as 2007 was the first full year in which electronic health records were implemented in all SLaM services (thereby ensuring a representative clinical sample of individuals receiving specialist mental healthcare) and to ensure that all individuals in the study had at least one year of follow-up data available.

## Source of clinical data

Data were extracted from the BRC Case Register using the Clinical Record Interactive Search (CRIS) application[22]. The CRIS application is a bespoke software package which permits focussed searching of anonymised electronic health records in the SLaM BRC Case Register and has contributed to a wide range of epidemiological studies of mental disorder outcomes [1,24,25]. The records include structured fields for demographic information and clinical questionnaires as well as unstructured free text to record history, mental state examination, diagnostic formulation and management plan. The clinical data are those recorded contemporaneously by mental health professionals during routine clinical care and included

correspondence between healthcare professionals such as clinic letters and discharge summaries. In order to maximise ascertainment of diagnosis and medication, data on these variables were obtained from unstructured free text clinical entries (as well as structured text fields) using natural language processing (NLP)[26]. All other variables were ascertained from structured fields.

### Predictor variables

The CRIS application was used to extract the following predictor variables from the dataset: whether admitted to hospital compulsorily under the UK Mental Health Act (MHA) within 2 weeks of first presentation to SLaM, and diagnoses of schizophrenia and related disorders (ICD-10 F2x), psychotic depression (ICD-10 F32.3/F33.3), unipolar depression without psychotic symptoms (ICD-10 F32/33 excluding F3x.3), anxiety disorder (ICD-10 F4x), personality disorder (ICD-10 F60/F61), alcohol misuse/dependence (ICD-10 F10.x) or illicit drug misuse/dependence (ICD-10 F11-19.x) recorded prior to the date of first bipolar disorder diagnosis.

The following variables were extracted as covariates for multivariable analyses: age, gender, ethnicity and marital status. All covariate data obtained were those closest to the time of first referral to SLaM.

### Outcome variables

The primary outcome variable was time to diagnosis of bipolar disorder (in days) measured from the date of first presentation to SLaM. We considered this time to represent the delay to diagnosis of bipolar disorder while receiving specialist mental healthcare. The secondary outcome variable was time to first prescription of appropriate treatment (in days) measured from the date of first presentation to SLaM. We considered this time to represent the delay to initiating treatment. Following previous work in this area[9] we defined appropriate pharmacological treatment with reference to the British Association of Psychopharmacology guidelines[27] as initiation of any of second generation antipsychotic, lithium, valproate, carbamazepine and lamotrigine[9].

### Statistical analysis

STATA (version 12) software was used[28]. Descriptive statistics for predictor and outcome variables were obtained as means and standard deviations for continuous variables (diagnostic delay and treatment delay) and as frequencies and percentages for all other variables. Associations between predictor/covariate variables and diagnostic delay/treatment delay were investigated using Kaplan-Meier survival analysis and multivariable Cox regression. Proportionality of hazards was tested on Schoenfeld residuals of diagnostic delay and treatment delay using the `phtest` command in STATA[28]. The hazard ratios in Cox regression analyses represent the probability of bipolar disorder diagnosis or initiation of treatment occurring during the period of follow-up. Therefore, a hazard ratio greater than 1.0 indicates an association of a predictor variable with reduced time to diagnosis or treatment compared to the reference category. Reference categories for Cox regression analysis were defined as those of greatest prevalence. In order to adjust for comorbidity between prior diagnoses, all prior diagnoses were entered as individual binary variables in the Cox regression analysis rather than analysing these as a single categorical variable. Bonferroni correction of confidence intervals and p values was performed to mitigate the possibility of a type 1 statistical error for categorical variables with more than one category. By virtue of the study inclusion criteria, all participants were diagnosed with bipolar disorder and so no censoring was required in the survival analysis of diagnostic delay. A further analysis of diagnostic delay using multiple linear regression was also performed as a

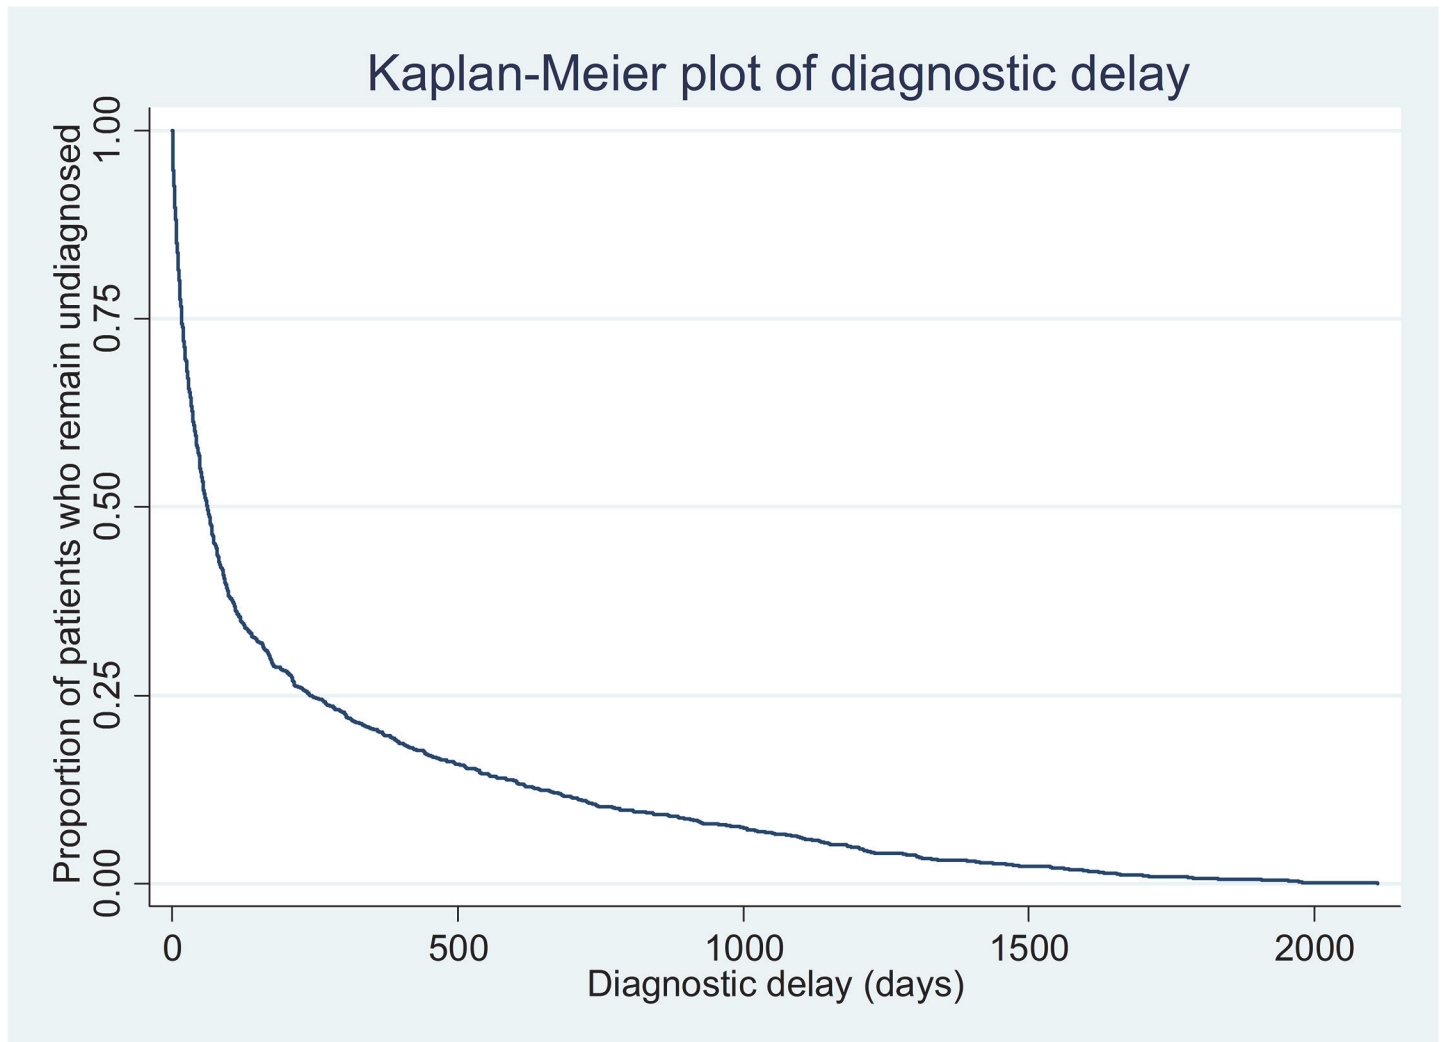

**Fig 1. Kaplan-Meier plot of diagnostic delay.**

doi:10.1371/journal.pone.0126530.g001

sensitivity analysis. For analysis of treatment delay, the outcome of starting appropriate treatment was censored at 31<sup>st</sup> December 2013. To investigate the impact of missing covariate data, the main analyses included missing data as a separate category and further sensitivity analyses were performed including only participants with full covariate data.

## Results

### Diagnostic delay

The median delay to diagnosis of bipolar disorder was 62 days (IQR 17–243). Kaplan-Meier analysis (Fig 1) illustrates the distribution of diagnostic delay over time. Table 1 shows the breakdown of diagnostic delay according to demographic characteristics and diagnoses recorded prior to bipolar disorder. There were no significant differences in diagnostic delay depending on age, gender, ethnicity or marital status. Prior diagnoses of other psychiatric disorders were associated with increased diagnostic delay compared to people without these prior diagnoses. In particular, prior diagnoses of alcohol or substance misuse disorders were

**Table 1. Factors associated with bipolar disorder diagnostic delay (n = 1364).**

| Factor               | Group                                                     | Number in sample | Percentage | Median diagnostic delay in days (IQR) | *Adjusted hazard ratio | 95% confidence interval, p value | Bonferroni corrected 95% confidence interval, p value |
|----------------------|-----------------------------------------------------------|------------------|------------|---------------------------------------|------------------------|----------------------------------|-------------------------------------------------------|
| Age (years)          | 16–25                                                     | 354              | 26.0%      | 75 (21–306)                           | 0.93                   | 0.80–1.08, p = 0.33              | 0.77–1.12, p = 1.0                                    |
|                      | 26–35                                                     | 442              | 32.4%      | 58 (15–201)                           | Reference              |                                  |                                                       |
|                      | 36–45                                                     | 314              | 23.0%      | 64 (21–262)                           | 0.93                   | 0.80–1.08, p = 0.36              | 0.77–1.13, p = 1.0                                    |
|                      | 46–55                                                     | 158              | 11.6%      | 49 (12–164)                           | 1.00                   | 0.83–1.20, p = 0.99              | 0.79–1.27, p = 1.0                                    |
|                      | 56–65                                                     | 96               | 7.0%       | 48 (13–360)                           | 0.95                   | 0.75–1.19, p = 0.64              | 0.71–1.27, p = 1.0                                    |
| Gender               | Female                                                    | 796              | 58.4%      | 62 (16–240)                           | Reference              |                                  |                                                       |
|                      | Male                                                      | 644              | 47.2%      | 63 (21–256)                           | 1.01                   | 0.90–1.13, p = 0.88              | 0.90–1.13, p = 0.88                                   |
| Ethnicity            | White                                                     | 837              | 61.4%      | 66 (18–262)                           | Reference              |                                  |                                                       |
|                      | Asian                                                     | 71               | 5.2%       | 63 (14–300)                           | 0.75                   | 0.58–0.99, p = 0.03              | 0.54–1.05, p = 0.13                                   |
|                      | Black                                                     | 239              | 17.5%      | 54 (12–301)                           | 1.02                   | 0.87–1.19, p = 0.84              | 0.83–1.25, p = 1.0                                    |
|                      | Other                                                     | 170              | 12.5%      | 56 (22–169)                           | 1.07                   | 0.90–1.26, p = 0.46              | 0.86–1.32, p = 1.0                                    |
|                      | Ethnicity not recorded                                    | 47               | 3.4%       | 54 (19–148)                           | 0.83                   | 0.61–1.12, p = 0.22              | 0.56–1.22, p = 0.87                                   |
| Marital status       | Married/Cohabiting                                        | 318              | 23.3%      | 49 (14–211)                           | 1.10                   | 0.96–1.26, p = 0.19              | 0.92–1.31, p = 0.76                                   |
|                      | Divorced/Separated                                        | 121              | 8.9%       | 79 (22–415)                           | 0.94                   | 0.76–1.15, p = 0.53              | 0.72–1.22, p = 1.0                                    |
|                      | Single                                                    | 824              | 60.4%      | 67 (19–270)                           | Reference              |                                  |                                                       |
|                      | Widowed                                                   | 12               | 0.9%       | 49 (12–140)                           | 1.08                   | 0.60–1.96, p = 0.79              | 0.51–2.30, p = 1.0                                    |
|                      | Marital status not recorded                               | 89               | 6.5%       | 35 (9–101)                            | 1.45                   | 1.16–1.83, p = 0.001             | 1.09–1.95, p = 0.005                                  |
| UK Mental Health Act | Compulsory admission within 2 weeks of first presentation | 232              | 17.0%      | 18 (6–70)                             | 2.58                   | 2.18–3.06, p<0.001               | 2.18–3.06, p<0.001                                    |
| Prior Diagnoses      | Schizophrenia or related disorders                        | 215              | 15.8%      | 212 (48–670)                          | 0.41                   | 0.34–0.48, p<0.001               | 0.34–0.48, p<0.001                                    |
|                      | Psychotic depression                                      | 37               | 2.7%       | 370 (93–929)                          | 0.71                   | 0.50–1.00, p = 0.05              | 0.50–1.00, p = 0.05                                   |
|                      | Unipolar depression without psychotic symptoms            | 138              | 10.1%      | 409 (123–1051)                        | 0.41                   | 0.34–0.49, p<0.001               | 0.34–0.49, p<0.001                                    |
|                      | Anxiety disorder                                          | 82               | 6.0%       | 442 (158–901)                         | 0.52                   | 0.41–0.65, p<0.001               | 0.41–0.65, p<0.001                                    |
|                      | Personality disorder                                      | 54               | 4.0%       | 504 (169–1044)                        | 0.59                   | 0.45–0.79, p<0.001               | 0.45–0.79, p<0.001                                    |
|                      | Alcohol misuse or dependence                              | 27               | 2.0%       | 705 (356–1341)                        | 0.48                   | 0.33–0.71, p<0.001               | 0.33–0.71, p<0.001                                    |
|                      | Illicit drug misuse or dependence                         | 36               | 2.6%       | 742 (320–1142)                        | 0.44                   | 0.31–0.61, p<0.001               | 0.31–0.61, p<0.001                                    |

\*Model adjusted for all factors listed in this table

doi:10.1371/journal.pone.0126530.t001



associated with substantially longer median delays to diagnosis. Compulsory admission under the UK Mental Health Act was associated with decreased diagnostic delay. These findings were corroborated on multivariable Cox Regression analysis. Multiple linear regression yielded comparable results (Table 2). A test of proportionality of hazards (Table 3) revealed a skewed distribution of diagnostic delay for compulsory admission, and prior diagnoses of schizophrenia and related disorders, unipolar depression without psychotic symptoms, anxiety disorders and illicit drug misuse or dependence. Although people with no recorded marital status were found to have shorter diagnostic delay, a sensitivity analysis including only those with full covariate data (Table 4) did not result in meaningful changes to the main findings.

## Treatment delay

Of the 1364 individuals included in this study, 1206 received appropriate treatment prior to 31<sup>st</sup> December 2013 (where data were censored). 117 individuals had a treatment delay of zero days and were not included in the multivariable Cox regression analysis resulting in 1247 participants included in this analysis. The median treatment delay was 31 days (IQR 4–122). 688 individuals (57.0%) were found to have a shorter treatment delay than diagnostic delay. Kaplan-Meier analysis (Fig 2) illustrates the distribution of treatment delay over time. Table 5 shows the breakdown of treatment delay according to demographic characteristics and diagnoses recorded prior to bipolar disorder. There were no significant differences in treatment delay depending on age, gender, ethnicity or marital status. In contrast to diagnostic delay, prior diagnoses of schizophrenia (and related disorders) and psychotic depression were associated with a reduction in median treatment delay. The greatest median treatment delay was seen among people with prior alcohol misuse/dependence. Compulsory admission under the UK Mental Health Act was associated with short treatment delay. A test of proportionality of hazards (Table 6) revealed a skewed distribution of treatment delay for compulsory admission and prior diagnoses of unipolar depression without psychotic symptoms and anxiety disorder. A sensitivity analysis including only those with full covariate data (Table 7) did not result in meaningful changes to these results.

## Variability in delays between patients

For both the delay before diagnosis, and the delay before treatment, the median and mean estimates do not convey the very large range in the length of these delays across the sample. In some patients, diagnosis and treatment were made within one day of presentation, but in others the delays extended for over five years (maximum diagnostic delay: 2110 days; maximum treatment delay: 2053 days).

## Discussion

Using a large electronic case register, we investigated the delay to diagnosis of bipolar disorder from initiation of specialist mental healthcare. The median delay to diagnosis from the point of receiving specialist mental healthcare was 62 days but varied widely (interquartile range 17–243 days). It is important to recognise that this figure does not correspond to the delay between the patient first experiencing symptoms, and diagnosis (which would be much longer), but the time between presentation to mental health services and diagnosis. Previous studies have indicated that delays to diagnosis from first experiencing symptoms of around 10 years[5–7] suggesting that there is a substantial delay from first experiencing symptoms to receiving mental healthcare. These studies obtained data from questionnaires given to patients with an established diagnosis of bipolar disorder. While they were able to elicit delays from first symptoms to bipolar disorder diagnosis, their retrospective designs are limited by the possibility of recall

**Table 2. Factors associated with bipolar disorder diagnostic delay (n = 1364) analysed using multiple linear regression.**

| Factor               | Group                                                     | Number in sample | Percentage | Median diagnostic delay in days (IQR) | * Adjusted B coefficient (days) | 95% confidence interval, p value | Bonferroni corrected 95% confidence interval, p value |
|----------------------|-----------------------------------------------------------|------------------|------------|---------------------------------------|---------------------------------|----------------------------------|-------------------------------------------------------|
| Age (years)          | 16–25                                                     | 354              | 26.0%      | 75 (21–306)                           | 6.4                             | -41.1, 53.9, p = 0.79            | -54.1, 66.9, p = 1.0                                  |
|                      | 26–35                                                     | 442              | 32.4%      | 58 (15–201)                           | Reference                       |                                  |                                                       |
|                      | 36–45                                                     | 314              | 23.0%      | 64 (21–262)                           | 2.4                             | -46.5, 51.2, p = 0.92            | -59.9, 64.6, p = 1.0                                  |
|                      | 46–55                                                     | 158              | 11.6%      | 49 (12–164)                           | -24.3                           | -85.7, 37.1, p = 0.44            | -102.6, 54.0, p = 1.0                                 |
|                      | 56–65                                                     | 96               | 7.0%       | 48 (13–360)                           | 28.2                            | -47.2, 103.6, p = 0.46           | -67.9, 124.4, p = 1.0                                 |
| Gender               | Female                                                    | 796              | 58.4%      | 62 (16–240)                           | Reference                       |                                  |                                                       |
|                      | Male                                                      | 644              | 47.2%      | 63 (21–256)                           | -9.4                            | -45.3, 26.5, p = 0.61            | -45.3, 26.5, p = 0.61                                 |
| Ethnicity            | White                                                     | 837              | 61.4%      | 66 (18–262)                           | Reference                       |                                  |                                                       |
|                      | Asian                                                     | 71               | 5.2%       | 63 (14–300)                           | 51.4                            | -29.8, 132.7, p = 0.21           | -52.1, 155.0, p = 0.86                                |
|                      | Black                                                     | 239              | 17.5%      | 54 (12–301)                           | 23.4                            | -26.8, 73.6, p = 0.36            | -40.6, 87.5, p = 1.0                                  |
|                      | Other                                                     | 170              | 12.5%      | 56 (22–169)                           | -6.3                            | -60.9, 48.4, p = 0.82            | -75.9, 63.4, p = 1.0                                  |
|                      | Ethnicity not recorded                                    | 47               | 3.4%       | 54 (19–148)                           | 49.1                            | -49.8, 147.9, p = 0.33           | -77.0, 175.1, p = 1.0                                 |
| Marital status       | Married/Cohabiting                                        | 318              | 23.3%      | 49 (14–211)                           | -7.9                            | -53.6, 37.8, p = 0.73            | -66.2, 50.3, p = 1.0                                  |
|                      | Divorced/Separated                                        | 121              | 8.9%       | 79 (22–415)                           | 23.3                            | -43.4, 90.0, p = 0.49            | -61.7, 108.3, p = 1.0                                 |
|                      | Single                                                    | 824              | 60.4%      | 67 (19–270)                           | Reference                       |                                  |                                                       |
|                      | Widowed                                                   | 12               | 0.9%       | 49 (12–140)                           | -1.4                            | -193.7, 191.0, p = 0.99          | -246.6, 243.9, p = 1.0                                |
|                      | Marital status not recorded                               | 89               | 6.5%       | 35 (9–101)                            | -80.4                           | -154.8, -6.1, p = 0.03           | -175.2, 14.4, p = 0.14                                |
| UK Mental Health Act | Compulsory admission within 2 weeks of first presentation | 232              | 17.0%      | 18 (6–70)                             | -144.3                          | -194.4, -94.2, p<0.001           | -194.4, -94.2, p<0.001                                |
| Prior Diagnoses      | Schizophrenia or related disorders                        | 215              | 15.8%      | 212 (48–670)                          | 214.8                           | 163.6, 266.0, p<0.001            | 163.6, 266.0, p<0.001                                 |
|                      | Psychotic depression                                      | 37               | 2.7%       | 370 (93–929)                          | 129.7                           | 17.4, 242.1, p = 0.02            | 17.4, 242.1, p = 0.02                                 |
|                      | Unipolar depression without psychotic symptoms            | 138              | 10.1%      | 409 (123–1051)                        | 352.6                           | 292.1, 413.0, p<0.001            | 292.1, 413.0, p<0.001                                 |
|                      | Anxiety disorder                                          | 82               | 6.0%       | 442 (158–901)                         | 235.6                           | 160.1, 311.2, p<0.001            | 160.1, 311.2, p<0.001                                 |
|                      | Personality disorder                                      | 54               | 4.0%       | 504 (169–1044)                        | 242.6                           | 148.3, 336.9, p<0.001            | 148.3, 336.9, p<0.001                                 |
|                      | Alcohol misuse or dependence                              | 27               | 2.0%       | 705 (356–1341)                        | 461.8                           | 334.5, 589.1, p<0.001            | 334.5, 589.1, p<0.001                                 |
|                      | Illicit drug misuse or dependence                         | 36               | 2.6%       | 742 (320–1142)                        | 363.0                           | 249.9, 476.1, p<0.001            | 249.9, 476.1, p<0.001                                 |

\*Model adjusted for all factors listed in this table

doi:10.1371/journal.pone.0126530.t002



**Table 3. Test of proportionality of hazards on Schoenfeld residuals for diagnostic delay.**

| Factor               | Group                                                     | Rho       | $\chi^2$ | P value |
|----------------------|-----------------------------------------------------------|-----------|----------|---------|
| Age (years)          | 16–25                                                     | 0.04      | 2.6      | 0.11    |
|                      | 26–35                                                     | Reference |          |         |
|                      | 36–45                                                     | 0.04      | 2.4      | 0.12    |
|                      | 46–55                                                     | 0.01      | 0.1      | 0.77    |
|                      | 56–65                                                     | -0.03     | 1.5      | 0.22    |
| Gender               | Female                                                    | Reference |          |         |
|                      | Male                                                      | 0.03      | 0.9      | 0.35    |
| Ethnicity            | White                                                     | Reference |          |         |
|                      | Asian                                                     | -0.04     | 2.6      | 0.11    |
|                      | Black                                                     | 0.01      | 0.05     | 0.83    |
|                      | Other                                                     | 0.06      | 5.8      | 0.02    |
|                      | Ethnicity not recorded                                    | -0.02     | 0.5      | 0.48    |
| Marital status       | Married/Cohabiting                                        | 0.01      | 0.3      | 0.59    |
|                      | Divorced/Separated                                        | 0.00      | 0.0      | 0.89    |
|                      | Single                                                    | Reference |          |         |
|                      | Widowed                                                   | 0.01      | 0.1      | 0.71    |
|                      | Marital status not recorded                               | 0.03      | 1.1      | 0.29    |
| UK Mental Health Act | Compulsory admission within 2 weeks of first presentation | -0.14     | 31.4     | <0.001  |
| Prior Diagnoses      | Schizophrenia or related disorders                        | 0.14      | 28.6     | <0.001  |
|                      | Psychotic depression                                      | 0.05      | 2.9      | 0.09    |
|                      | Unipolar depression without psychotic symptoms            | 0.12      | 17.9     | <0.001  |
|                      | Anxiety disorder                                          | 0.12      | 20.9     | <0.001  |
|                      | Personality disorder                                      | 0.06      | 4.0      | 0.05    |
|                      | Alcohol misuse or dependence                              | 0.04      | 1.6      | 0.20    |
|                      | Illicit drug misuse or dependence                         | 0.08      | 8.7      | 0.003   |

doi:10.1371/journal.pone.0126530.t003

and information bias. It was not possible to obtain data from first symptoms to diagnosis in our study but our findings are strengthened by the use of prospectively recorded clinical data.

Our study included a maximum follow-up period of seven years (1<sup>st</sup> January 2007 to 31<sup>st</sup> December 2013). It is therefore possible that a longer follow-up period would have identified more people with greater diagnostic delay. However, given that the 75<sup>th</sup> percentile for diagnostic delay was reached within one year follow-up, it is unlikely that a significant proportion of people had a delay to diagnosis from first presentation to mental health services extending beyond the period of this study. Although, based on previous studies, it is likely that there was a substantial additional delay from first experiencing symptoms to receiving specialist mental healthcare.

In our study, the median delay to receiving appropriate treatment for bipolar disorder was 31 days (interquartile range 4–122). The fact that the treatment delay was shorter than diagnostic delay in the majority of participants may reflect the initiation of treatment by clinicians prior to recording a formal diagnosis of bipolar disorder in electronic health records or in correspondence to other healthcare professionals. The median treatment delay in our study compares with a mean delay of 4.4 years following hospital admission in a study reported by Drancourt et al[9]. It may be that differences between our study and Drancourt et al reflect variations in the distribution of mental healthcare between primary and secondary services in different healthcare settings[29]. It is possible that in our study a substantial delay has already occurred from the time of first seeking help in primary care services to being referred to

**Table 4. Factors associated with bipolar disorder diagnostic delay only including participants with complete covariate data (n = 1244).**

| Factor               | Group                                                     | Number in sample | Percentage | Median diagnostic delay in days (IQR) | *Adjusted hazard ratio | 95% confidence interval, p value | Bonferroni corrected 95% confidence interval, p value |
|----------------------|-----------------------------------------------------------|------------------|------------|---------------------------------------|------------------------|----------------------------------|-------------------------------------------------------|
| Age (years)          | 16–25                                                     | 324              | 23.8%      | 70 (20–308)                           | 0.99                   | 0.85–1.15, p = 0.89              | 0.81–1.20, p = 1.0                                    |
|                      | 26–35                                                     | 404              | 29.6%      | 62 (16–214)                           | Reference              |                                  |                                                       |
|                      | 36–45                                                     | 277              | 20.3%      | 70 (23–327)                           | 0.97                   | 0.83–1.14, p = 0.73              | 0.79–1.19, p = 1.0                                    |
|                      | 46–55                                                     | 150              | 11.0%      | 51 (14–166)                           | 1.02                   | 0.84–1.23, p = 0.87              | 0.79–1.30, p = 1.0                                    |
|                      | 56–65                                                     | 89               | 6.5%       | 49 (13–390)                           | 0.95                   | 0.75–1.20, p = 0.66              | 0.70–1.28, p = 1.0                                    |
| Gender               | Female                                                    | 734              | 53.8%      | 65 (16–267)                           | Reference              |                                  |                                                       |
|                      | Male                                                      | 510              | 37.4%      | 64 (21–297)                           | 1.01                   | 0.90–1.13, p = 0.87              | 0.90–1.13, p = 0.87                                   |
| Ethnicity            | White                                                     | 785              | 57.6%      | 68 (19–282)                           | Reference              |                                  |                                                       |
|                      | Asian                                                     | 66               | 4.8%       | 70 (17–308)                           | 0.2                    | 0.55–0.94, p = 0.02              | 0.51–1.00, p = 0.05                                   |
|                      | Black                                                     | 232              | 17.0%      | 55 (13–301)                           | 1.03                   | 0.87–1.21, p = 0.73              | 0.84–1.26, p = 1.0                                    |
|                      | Other                                                     | 161              | 11.8%      | 56 (22–170)                           | 1.07                   | 0.90–1.27, p = 0.42              | 0.87–1.32, p = 1.0                                    |
| Marital status       | Married/Cohabiting                                        | 311              | 22.8%      | 50 (14–214)                           | 1.1                    | 0.96–1.27, p = 0.19              | 0.93–1.31, p = 0.56                                   |
|                      | Divorced/Separated                                        | 117              | 8.6%       | 79 (22–420)                           | 0.94                   | 0.76–1.16, p = 0.57              | 0.73–1.22, p = 1.0                                    |
|                      | Single                                                    | 804              | 58.9%      | 67 (19–276)                           | Reference              |                                  |                                                       |
|                      | Widowed                                                   | 12               | 0.9%       | 49 (12–140)                           | 1.11                   | 0.61–2.00, p = 0.73              | 0.54–2.29, p = 1.0                                    |
| UK Mental Health Act | Compulsory admission within 2 weeks of first presentation | 216              | 15.8%      | 21 (6–79)                             | 2.47                   | 2.07–2.94, p<0.001               | 2.07–2.94, p<0.001                                    |
| Prior Diagnoses      | Schizophrenia or related disorders                        | 208              | 15.2%      | 214 (49–686)                          | 0.4                    | 0.34–0.48, p<0.001               | 0.34–0.48, p<0.001                                    |
|                      | Psychotic depression                                      | 37               | 2.7%       | 370 (93–929)                          | 0.73                   | 0.52–1.04, p = 0.08              | 0.52–1.04, p = 0.08                                   |
|                      | Unipolar depression without psychotic symptoms            | 133              | 9.8%       | 413 (128–1051)                        | 0.4                    | 0.33–0.48, p<0.001               | 0.33–0.48, p<0.001                                    |
|                      | Anxiety disorder                                          | 78               | 5.7%       | 442 (158–901)                         | 0.51                   | 0.41–0.65, p<0.001               | 0.41–0.65, p<0.001                                    |
|                      | Personality disorder                                      | 52               | 3.8%       | 494 (154–1025)                        | 0.61                   | 0.45–0.81, p = 0.001             | 0.45–0.81, p = 0.001                                  |
|                      | Alcohol misuse or dependence                              | 26               | 1.9%       | 705 (389–1341)                        | 0.45                   | 0.30–0.68, p<0.001               | 0.30–0.68, p<0.001                                    |
|                      | Illicit drug misuse or dependence                         | 36               | 2.6%       | 742 (320–1142)                        | 0.43                   | 0.31–0.61, p<0.001               | 0.31–0.61, p<0.001                                    |

\*Model adjusted for all factors listed in this table

doi:10.1371/journal.pone.0126530.t004

secondary mental healthcare services (resulting in a relative reduction in delay to diagnosis after presenting to secondary mental healthcare services) and that the threshold for initiating such a referral varies between different healthcare settings. Further research investigating

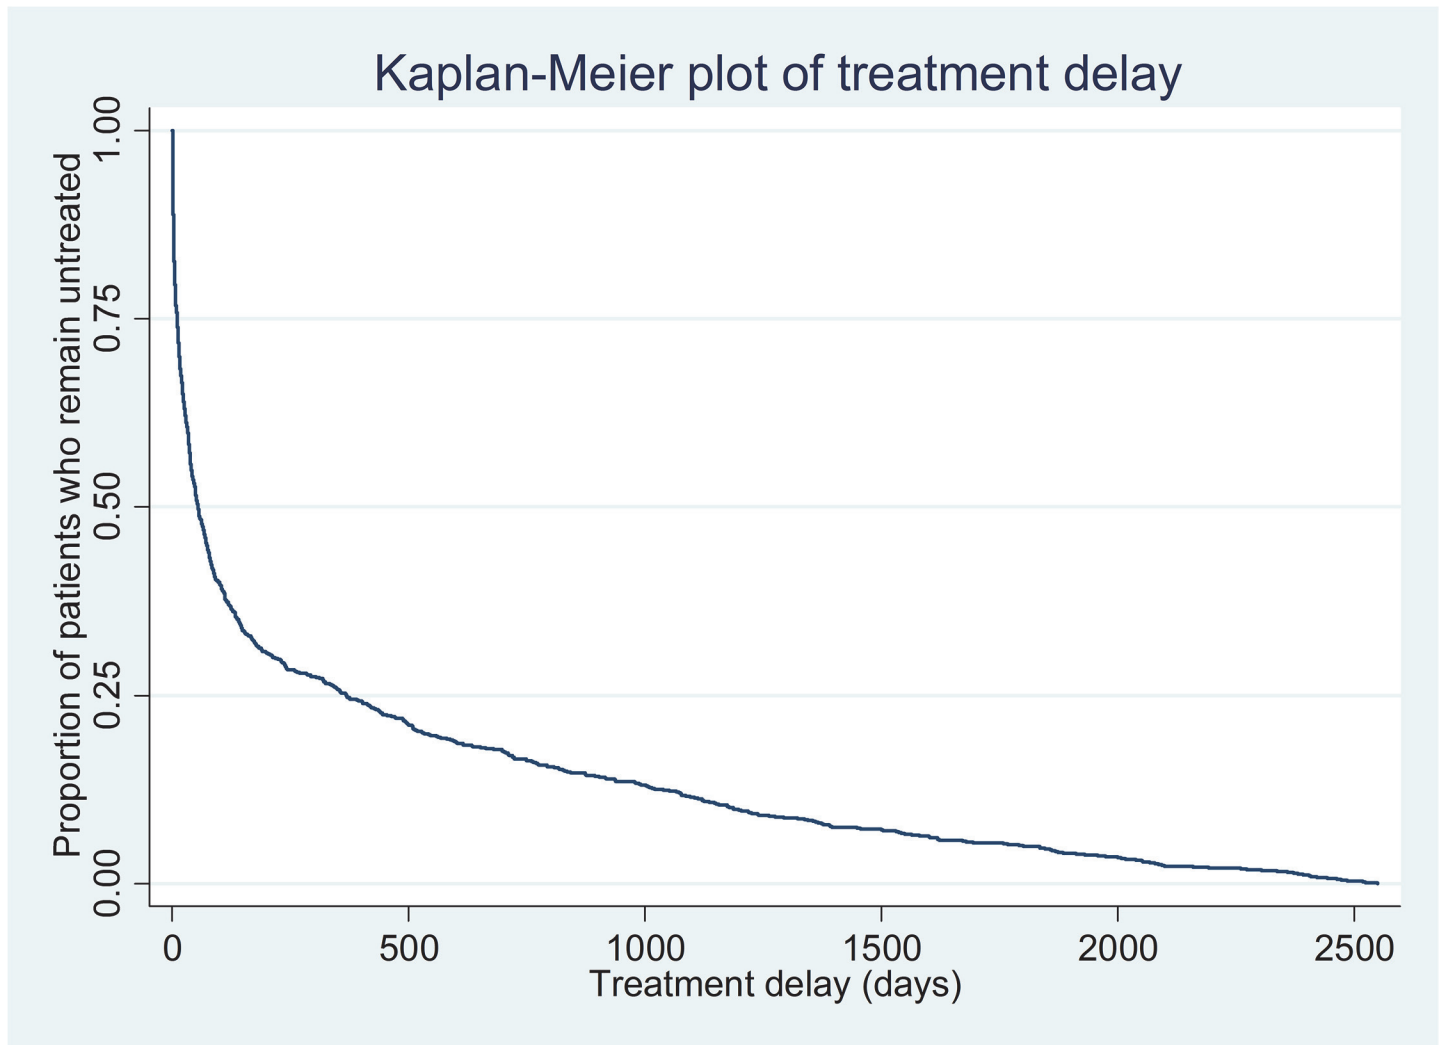

**Fig 2. Kaplan-Meier plot of treatment delay.**

doi:10.1371/journal.pone.0126530.g002

diagnostic and treatment delay using records from primary healthcare services may help to elucidate whether this is the case.

We established that there was no significant association of age, gender, ethnicity or marital status with diagnostic or treatment delay. However, mode of presentation and previous diagnoses were associated with substantial differences in diagnostic and treatment delay. People who underwent compulsory admission to hospital under the UK Mental Health Act had a shorter delay to diagnosis and treatment. The reduced delay within this group may be explained by increased severity of illness at presentation which necessitates prompt treatment and facilitates diagnosis. However, it is possible this group may have experienced underlying symptoms of bipolar disorder for some time prior to presentation to specialist mental healthcare services.

Greater delays to diagnosis were seen among individuals with other psychiatric diagnoses recorded prior to bipolar disorder. The greatest delays were associated with prior diagnoses of alcohol or substance misuse disorders. This may reflect misattribution of symptoms of underlying bipolar disorder to an existing diagnostic framework rather than considering an alternative diagnosis. Furthermore, previous research suggests that people with symptoms of mania,

**Table 5. Factors associated with bipolar disorder treatment delay (n = 1247)\*.**

| Factor               | Group                                                     | Number in sample | Percentage | Median treatment delay in days (IQR) | ** Adjusted hazard ratio | 95% confidence interval, p value | Bonferroni corrected 95% confidence interval, p value |
|----------------------|-----------------------------------------------------------|------------------|------------|--------------------------------------|--------------------------|----------------------------------|-------------------------------------------------------|
| Age (years)          | 16–25                                                     | 314              | 25.2%      | 67 (7–532)                           | 0.90                     | 0.76–1.06, p = 0.21              | 0.73–1.11, p = 0.85                                   |
|                      | 26–35                                                     | 408              | 32.7%      | 46 (9–260)                           | Reference                |                                  |                                                       |
|                      | 36–45                                                     | 288              | 23.1%      | 58 (15–369)                          | 0.96                     | 0.81–1.13, p = 0.59              | 0.77–1.18, p = 1.0                                    |
|                      | 46–55                                                     | 150              | 12.0%      | 59 (12–318)                          | 1.06                     | 0.87–1.30, p = 0.57              | 0.82–1.38, p = 1.0                                    |
|                      | 56–65                                                     | 87               | 7.0%       | 69 (19–367)                          | 0.81                     | 0.62–1.05, p = 0.11              | 0.58–1.13, p = 0.43                                   |
| Gender               | Female                                                    | 720              | 57.7%      | 57 (11–369)                          | Reference                |                                  |                                                       |
|                      | Male                                                      | 527              | 42.3%      | 51 (10–366)                          | 1.09                     | 0.96–1.23, p = 0.19              | 0.96–1.23, p = 0.19                                   |
| Ethnicity            | White                                                     | 776              | 62.2%      | 73 (15–454)                          | Reference                |                                  |                                                       |
|                      | Asian                                                     | 55               | 4.4%       | 20 (3–50)                            | 1.44                     | 1.08–1.93, p = 0.01              | 1.00–2.08, p = 0.05                                   |
|                      | Black                                                     | 208              | 16.7%      | 16 (3–147)                           | 1.14                     | 0.96–1.36, p = 0.14              | 0.91–1.42, p = 0.55                                   |
|                      | Other                                                     | 163              | 13.1%      | 56 (14–241)                          | 0.97                     | 0.81–1.17, p = 0.78              | 0.77–1.23, p = 1.0                                    |
|                      | Ethnicity not recorded                                    | 45               | 3.6%       | 83 (38–)***                          | 0.68                     | 0.48–0.98, p = 0.04              | 0.43–1.08, p = 0.16                                   |
| Marital status       | Married/Cohabiting                                        | 288              | 23.1%      | 38 (8–206)                           | 1.05                     | 0.90–1.23, p = 0.52              | 0.86–1.28, p = 1.0                                    |
|                      | Divorced/Separated                                        | 113              | 9.1%       | 55 (11–369)                          | 1.18                     | 0.95–1.48, p = 0.13              | 0.89–1.57, p = 0.54                                   |
|                      | Single                                                    | 757              | 60.7%      | 67 (10–434)                          | Reference                |                                  |                                                       |
|                      | Widowed                                                   | 11               | 0.9%       | 73 (13–826)                          | 0.42                     | 0.21–0.84, p = 0.01              | 0.17–1.02, p = 0.06                                   |
|                      | Marital status not recorded                               | 78               | 6.3%       | 54 (14–1039)                         | 0.89                     | 0.67–1.17, p = 0.40              | 0.63–1.26, p = 1.0                                    |
| UK Mental Health Act | Compulsory admission within 2 weeks of first presentation | 186              | 14.9%      | 3 (1–8)                              | 4.40                     | 3.64–5.32, p<0.001               | 3.64–5.32, p<0.001                                    |
| Prior Diagnoses      | Schizophrenia or related disorders                        | 183              | 14.7%      | 9 (3–75)                             | 1.39                     | 1.17–1.66, p<0.001               | 1.17–1.66, p<0.001                                    |
|                      | Psychotic depression                                      | 35               | 2.8%       | 17 (4–109)                           | 1.69                     | 1.18–2.43, p = 0.004             | 1.18–2.43, p = 0.004                                  |
|                      | Unipolar depression without psychotic symptoms            | 136              | 10.9%      | 237 (35–925)                         | 0.75                     | 0.61–0.92, p = 0.005             | 0.61–0.92, p = 0.005                                  |
|                      | Anxiety disorder                                          | 81               | 6.5%       | 238 (24–792)                         | 0.72                     | 0.56–0.92, p = 0.009             | 0.56–0.92, p = 0.009                                  |
|                      | Personality disorder                                      | 50               | 4.0%       | 179 (29–807)                         | 0.92                     | 0.67–1.26, p = 0.61              | 0.67–1.26, p = 0.61                                   |
|                      | Alcohol misuse or dependence                              | 26               | 2.1%       | 705 (231–1221)                       | 0.59                     | 0.38–0.90, p = 0.02              | 0.38–0.90, p = 0.02                                   |
|                      | Illicit drug misuse or dependence                         | 33               | 2.6%       | 352 (11–1104)                        | 0.80                     | 0.55–1.17, p = 0.24              | 0.55–1.17, p = 0.24                                   |

\*117 cases dropped in Cox regression analysis with treatment delay of 0 days

\*\*Model adjusted for all factors listed in this table

\*\*\*75% percentile inestimable due to right censoring

doi:10.1371/journal.pone.0126530.t005

**Table 6. Test of proportionality of hazards on Schoenfeld residuals for treatment delay.**

| Factor               | Group                                                     | Rho       | $\chi^2$ | P value |
|----------------------|-----------------------------------------------------------|-----------|----------|---------|
| Age (years)          | 16–25                                                     | 0.02      | 0.5      | 0.48    |
|                      | 26–35                                                     | Reference |          |         |
|                      | 36–45                                                     | 0.07      | 4.9      | 0.03    |
|                      | 46–55                                                     | 0.05      | 3.0      | 0.08    |
|                      | 56–65                                                     | 0.06      | 4.5      | 0.03    |
| Gender               | Female                                                    | Reference |          |         |
|                      | Male                                                      | 0.02      | 0.5      | 0.48    |
| Ethnicity            | White                                                     | Reference |          |         |
|                      | Asian                                                     | -0.02     | 0.4      | 0.52    |
|                      | Black                                                     | -0.02     | 0.3      | 0.59    |
|                      | Other                                                     | 0.01      | 0.1      | 0.83    |
|                      | Ethnicity not recorded                                    | -0.01     | 0.0      | 0.84    |
| Marital status       | Married/Cohabiting                                        | -0.03     | 1.11     | 0.30    |
|                      | Divorced/Separated                                        | 0.01      | 0.2      | 0.65    |
|                      | Single                                                    | Reference |          |         |
|                      | Widowed                                                   | -0.02     | 0.6      | 0.44    |
|                      | Marital status not recorded                               | -0.07     | 5.4      | 0.02    |
| UK Mental Health Act | Compulsory admission within 2 weeks of first presentation | -0.13     | 17.4     | <0.001  |
| Prior Diagnoses      | Schizophrenia or related disorders                        | -0.01     | 0.1      | 0.83    |
|                      | Psychotic depression                                      | -0.01     | 0.1      | 0.73    |
|                      | Unipolar depression without psychotic symptoms            | 0.10      | 10.8     | 0.001   |
|                      | Anxiety disorder                                          | 0.08      | 6.6      | 0.01    |
|                      | Personality disorder                                      | 0.05      | 2.3      | 0.13    |
|                      | Alcohol misuse or dependence                              | 0.05      | 2.4      | 0.12    |
|                      | Illicit drug misuse or dependence                         | 0.02      | 0.5      | 0.50    |

doi:10.1371/journal.pone.0126530.t006

hypomania or depression are at increased risk of developing alcohol and substance misuse disorders after initial onset of these symptoms[30,31]. These findings warrant increased awareness of the possibility of dual diagnosis of a substance misuse disorder and bipolar disorder among clinicians who see people at risk of these disorders[32]. While current UK treatment guidelines highlight the need for prompt recognition and treatment of both substance misuse[33] and bipolar disorder[27], there is a clear need for further research in order to better understand and treat comorbidity between the two disorders[34].

Our data also indicate a marked diagnostic delay in people who present with a prior history of unipolar depression or anxiety. It is possible that a true diagnosis of bipolar disorder is difficult to elicit in such people if they have no clear history of symptoms of mania or hypomania [35]. Delays to treatment were noted in people with other prior psychiatric diagnoses with the exception of schizophrenia and psychotic depression. This could be explained by the use of second generation antipsychotics to treat these disorders (which are also indicated in the treatment of bipolar disorder) and indicates that misattribution of bipolar disorder symptoms to another psychotic disorder may not significantly delay access to appropriate therapy even if diagnosis of bipolar disorder is delayed. Taken together, these findings indicate a need to be aware of bipolar disorder in the differential diagnosis of individuals with other psychiatric disorders, particularly among those with drug and alcohol misuse who may be using these substances secondary to experiencing affective or psychotic symptoms due to underlying bipolar disorder[18,30].

**Table 7. Factors associated with bipolar disorder treatment delay only including participants with complete covariate data (n = 1140)\*.**

| Factor               | Group                                                     | Number in sample | Percentage | Median treatment delay in days (IQR) | ** Adjusted hazard ratio | 95% confidence interval, p value | Bonferroni corrected 95% confidence interval, p value |
|----------------------|-----------------------------------------------------------|------------------|------------|--------------------------------------|--------------------------|----------------------------------|-------------------------------------------------------|
| Age (years)          | 16–25                                                     | 287              | 21.0%      | 51 (6–403)                           | 0.96                     | 0.81–1.14, p = 0.66              | 0.77–1.20, p = 1.0                                    |
|                      | 26–35                                                     | 373              | 27.3%      | 49 (9–312)                           | Reference                |                                  |                                                       |
|                      | 36–45                                                     | 255              | 18.7%      | 55 (15–356)                          | 0.99                     | 0.83–1.18, p = 0.92              | 0.79–1.24, p = 1.0                                    |
|                      | 46–55                                                     | 143              | 10.5%      | 59 (12–240)                          | 1.1                      | 0.90–1.36, p = 0.36              | 0.85–1.44, p = 1.0                                    |
|                      | 56–65                                                     | 82               | 6.0%       | 68 (19–367)                          | 0.8                      | 0.61–1.05, p = 0.11              | 0.53–1.13, p = 0.43                                   |
| Gender               | Female                                                    | 665              | 48.8%      | 56 (11–357)                          | Reference                |                                  |                                                       |
|                      | Male                                                      | 475              | 34.8%      | 50 (8–341)                           | 1.09                     | 0.96–1.24, p = 0.17              | 0.96–1.24, p = 0.17                                   |
| Ethnicity            | White                                                     | 731              | 53.6%      | 73 (16–434)                          | Reference                |                                  |                                                       |
|                      | Asian                                                     | 52               | 3.8%       | 19 (3–50)                            | 1.43                     | 1.07–1.93, p = 0.02              | 1.00–2.06, p = 0.05                                   |
|                      | Black                                                     | 202              | 14.8%      | 16 (3–151)                           | 1.13                     | 0.94–1.35, p = 0.18              | 0.91–1.40, p = 0.55                                   |
|                      | Other                                                     | 155              | 11.4%      | 56 (14–260)                          | 0.96                     | 0.79–1.16, p = 0.65              | 0.76–1.21, p = 1.0                                    |
| Marital status       | Married/Cohabiting                                        | 281              | 20.6%      | 38 (8–212)                           | 1.05                     | 0.90–1.23, p = 0.54              | 0.87–1.28, p = 1.0                                    |
|                      | Divorced/Separated                                        | 110              | 8.1%       | 53 (11–369)                          | 1.21                     | 0.97–1.52, p = 0.09              | 0.92–1.59, p = 0.28                                   |
|                      | Single                                                    | 738              | 54.1%      | 65 (10–403)                          | Reference                |                                  |                                                       |
|                      | Widowed                                                   | 11               | 0.8%       | 13 (73–826)                          | 0.42                     | 0.21–0.84, p = 0.02              | 0.18–0.98, p = 0.04                                   |
| UK Mental Health Act | Compulsory admission within 2 weeks of first presentation | 175              | 12.8%      | 4 (1–8)                              | 4.26                     | 3.50–5.19, p<0.001               | 3.50–5.19, p<0.001                                    |
| Prior Diagnoses      | Schizophrenia or related disorders                        | 180              | 13.2%      | 9 (3–68)                             | 0.42                     | 1.19–1.70, p<0.001               | 1.19–1.70, p<0.001                                    |
|                      | Psychotic depression                                      | 35               | 2.6%       | 17 (4–109)                           | 1.71                     | 1.19–2.45, p = 0.003             | 1.19–2.45, p = 0.003                                  |
|                      | Unipolar depression without psychotic symptoms            | 131              | 9.6%       | 218 (35–876)                         | 0.75                     | 0.61–0.92, p = 0.006             | 0.61–0.92, p = 0.006                                  |
|                      | Anxiety disorder                                          | 77               | 5.6%       | 238 (24–792)                         | 0.68                     | 0.53–0.88, p = 0.003             | 0.53–0.88, p = 0.003                                  |
|                      | Personality disorder                                      | 48               | 3.5%       | 169 (26–709)                         | 0.93                     | 0.68–1.28, p = 0.66              | 0.68–1.28, p = 0.66                                   |
|                      | Alcohol misuse or dependence                              | 25               | 1.8%       | 832 (304–1221)                       | 0.54                     | 0.35–0.84, p = 0.006             | 0.35–0.84, p = 0.006                                  |
|                      | Illicit drug misuse or dependence                         | 33               | 2.4%       | 352 (11–1104)                        | 0.78                     | 0.54–1.14, p = 0.21              | 0.54–1.14, p = 0.21                                   |

\*117 cases dropped in Cox regression analysis with treatment delay of 0 days

\*\*Model adjusted for all factors listed in this table

doi:10.1371/journal.pone.0126530.t007



## Strengths and Limitations

The generalisability of our findings is strengthened because they were derived from routinely recorded clinical information that is representative of a population served by a large centre for mental healthcare. Furthermore, the data analysed in our study were recorded prospectively, thereby reducing the risk of information and recall bias. Although there were some missing data for covariates (ethnicity and marital status), sensitivity analyses including only participants with complete covariate data did not yield any meaningful differences in outcomes. Tests of proportionality of hazards did reveal skewed distribution of diagnostic delay and treatment delay for certain predictor variables. It is therefore not possible to make comparative inferences based on the relative magnitude of hazard ratios between predictor variables. However, it is still possible to draw the conclusions described previously based on differences in the direction of hazard between predictor variables. Furthermore, multiple linear regression revealed comparable results to Cox regression in the analysis of diagnostic delay.

Our study is also limited by virtue of analysing routinely recorded clinical data from secondary mental healthcare records. It was only possible to investigate factors associated with diagnostic and treatment delay from the point of receiving specialist mental healthcare in the centre investigated in our study. However, some individuals within the catchment area of the study centre may have initially presented to other healthcare services. It is therefore possible that the associations on subsequent delay reported in our study would be applicable to delays while receiving non-specialist healthcare. Further study examining clinical records from primary healthcare would help to elucidate this. Although 75% of people included in our study had been diagnosed within one year of follow-up, the follow-up period of 2007 to 2012 may not have been long enough to identify people with even longer delays to bipolar disorder diagnosis. While it was possible to obtain data on a range of demographic and diagnostic variables, it was not possible to obtain detailed diagnostic and symptom data using clinical rating scales such as the SCAN[36] or YMRS[37]. Previous studies have indicated that factors such as employment status[38], social support[39], deliberate self-harm[40] and the clinical experience of clinicians who first assess patients may play a role in determining delays to diagnosis and treatment. Although it was possible to analyse data on age, gender, ethnicity and marital status in our study, it was not possible to obtain data on other factors from routinely recorded electronic health records.

## Conclusion

In summary, our study indicates that certain individuals experience a significant delay in diagnosis and treatment of bipolar disorder after initiation of specialist mental healthcare, particularly those who have prior diagnoses of alcohol and substance misuse disorders. These findings highlight a need for further study on strategies to better identify underlying symptoms and offer appropriate treatment sooner in order to facilitate improved clinical outcomes, such as developing specialist early intervention services to identify and treat people with bipolar disorder.

## Author Contributions

Conceived and designed the experiments: MT. Performed the experiments: RP HS RJ MB. Analyzed the data: RP. Wrote the paper: RP RS JB PM MT.

## References

1. Chang C-K, Hayes RD, Perera G, Broadbent MTM, Fernandes AC, et al. (2011) Life Expectancy at Birth for People with Serious Mental Illness and Other Major Disorders from a Secondary Mental Health

- Care Case Register in London. PLoS One 6: e19590. Available: <http://dx.doi.org/10.1371/journal.pone.0019590>. doi: [10.1371/journal.pone.0019590](https://doi.org/10.1371/journal.pone.0019590) PMID: [21611123](https://pubmed.ncbi.nlm.nih.gov/21611123/)
2. Ösby U, Brandt L, Correia N, Ekborn A, Sparén P (2001) Excess Mortality in Bipolar and Unipolar Disorder in Sweden. *Arch Gen Psychiatry* 58: 844–850. Available: <http://dx.doi.org/10.1001/archpsyc.58.9.844>. PMID: [11545667](https://pubmed.ncbi.nlm.nih.gov/11545667/)
  3. Vos T, Flaxman AD, Naghavi M, Lozano R, Michaud C, et al. (2012) Years lived with disability (YLDs) for 1160 sequelae of 289 diseases and injuries 1990–2010: a systematic analysis for the Global Burden of Disease Study 2010. *Lancet* 380: 2163–2196. Available: <http://www.sciencedirect.com/science/article/pii/S0140673612617292>. doi: [10.1016/S0140-6736\(12\)61729-2](https://doi.org/10.1016/S0140-6736(12)61729-2) PMID: [23245607](https://pubmed.ncbi.nlm.nih.gov/23245607/)
  4. McCrone P, Dhanasiri S, Patel A, Knapp M, Lawton-Smith S (2008) Paying the Price: The cost of mental health care in England to 2026. *The King's Fund*. 165 p.
  5. Hirschfeld RMA, Lewis L, Vornik LA (2003) Perceptions and impact of bipolar disorder: How far have we really come? Results of the National Depressive and Manic-Depressive Association 2000 survey of individuals with bipolar disorder. *J Clin Psychiatry* 64: 161–174. doi: [10.4088/JCP.v64n0209](https://doi.org/10.4088/JCP.v64n0209) PMID: [12633125](https://pubmed.ncbi.nlm.nih.gov/12633125/)
  6. Berk M, Dodd S, Callaly P, Berk L, Fitzgerald P, et al. (2007) History of illness prior to a diagnosis of bipolar disorder or schizoaffective disorder. *J Affect Disord* 103: 181–186. PMID: [17324469](https://pubmed.ncbi.nlm.nih.gov/17324469/)
  7. Suppes T, Leverich GS, Keck PE Jr., Nolen WA, Denicoff KD, et al. (2001) The Stanley Foundation Bipolar Treatment Outcome Network: II. demographics and illness characteristics of the first 261 patients. *J Affect Disord* 67: 45–59. PMID: [11869752](https://pubmed.ncbi.nlm.nih.gov/11869752/)
  8. Goldberg JF, Ernst CL (2002) Features associated with the delayed initiation of mood stabilizers at illness onset in bipolar disorder. *J Clin Psychiatry* 63: 985–991. PMID: [12444811](https://pubmed.ncbi.nlm.nih.gov/12444811/)
  9. Drancourt N, Etain B, Lajnef M, Henry C, Raust A, et al. (2013) Duration of untreated bipolar disorder: missed opportunities on the long road to optimal treatment. *Acta Psychiatr Scand* 127: 136–144. doi: [10.1111/j.1600-0447.2012.01917.x](https://doi.org/10.1111/j.1600-0447.2012.01917.x) PMID: [22901015](https://pubmed.ncbi.nlm.nih.gov/22901015/)
  10. Altamura A C, Dell'Osso B, Berlin H a, Buoli M, Bassetti R, et al. (2010) Duration of untreated illness and suicide in bipolar disorder: a naturalistic study. *Eur Arch Psychiatry Clin Neurosci* 260: 385–391. Available: <http://www.ncbi.nlm.nih.gov/pubmed/19911248>. Accessed 23 September 2013. doi: [10.1007/s00406-009-0085-2](https://doi.org/10.1007/s00406-009-0085-2) PMID: [19911248](https://pubmed.ncbi.nlm.nih.gov/19911248/)
  11. Post RM, Leverich GS, Kupka RW, Keck PE Jr., McElroy SL, et al. (2010) Early-onset bipolar disorder and treatment delay are risk factors for poor outcome in adulthood. *J Clin Psychiatry* 71: 864. doi: [10.4088/JCP.08m04994ye1](https://doi.org/10.4088/JCP.08m04994ye1) PMID: [20667291](https://pubmed.ncbi.nlm.nih.gov/20667291/)
  12. Kessing LV, Hansen MG, Andersen PK, Angst J (2004) The predictive effect of episodes on the risk of recurrence in depressive and bipolar disorders—a life long perspective. *Acta Psychiatr Scand* 109: 339–344. PMID: [15049770](https://pubmed.ncbi.nlm.nih.gov/15049770/)
  13. Bourne C, Aydemir Ö, Balanzá-Martínez V, Bora E, Brissos S, et al. (2013) Neuropsychological testing of cognitive impairment in euthymic bipolar disorder: an individual patient data meta-analysis. *Acta Psychiatr Scand* 128: 149–162. doi: [10.1111/acps.12133](https://doi.org/10.1111/acps.12133) PMID: [23617548](https://pubmed.ncbi.nlm.nih.gov/23617548/)
  14. Goldberg JF, Truman CJ (2003) Antidepressant-induced mania: an overview of current controversies. *Bipolar Disord* 5: 407–420. PMID: [14636364](https://pubmed.ncbi.nlm.nih.gov/14636364/)
  15. Altshuler LL, Suppes T, Black DO, Nolen WA, Leverich G, et al. (2006) Lower switch rate in depressed patients with bipolar II than bipolar I disorder treated adjunctively with second-generation antidepressants. *Am J Psychiatry* 163: 313–315. PMID: [16449487](https://pubmed.ncbi.nlm.nih.gov/16449487/)
  16. Baca-García E, Perez-Rodríguez MM, Basurte-Villamor I, López-Castromán J, Fernández del Moral AL, et al. (2007) Diagnostic stability and evolution of bipolar disorder in clinical practice: a prospective cohort study. *Acta Psychiatr Scand* 115: 473–480. Available: <http://dx.doi.org/10.1111/j.1600-0447.2006.00984.x>. PMID: [17498159](https://pubmed.ncbi.nlm.nih.gov/17498159/)
  17. Pagel T, Baldessarini RJ, Franklin J, Baethge C (2013) Characteristics of patients diagnosed with schizoaffective disorder compared with schizophrenia and bipolar disorder. *Bipolar Disord* 15: 229–239. Available: <http://dx.doi.org/10.1111/bdi.12057>. doi: [10.1111/bdi.12057](https://doi.org/10.1111/bdi.12057) PMID: [23528024](https://pubmed.ncbi.nlm.nih.gov/23528024/)
  18. Lagerberg TV, Larsson S, Sundet K, Hansen CB, Hellvin T, et al. (2010) Treatment Delay and Excessive Substance Use in Bipolar Disorder. *J Nerv Ment Dis* 198. Available: [http://journals.lww.com/jonmd/Fulltext/2010/09000/Treatment\\_Delay\\_and\\_Excessive\\_Substance\\_Use\\_in.4.aspx](http://journals.lww.com/jonmd/Fulltext/2010/09000/Treatment_Delay_and_Excessive_Substance_Use_in.4.aspx).
  19. Berk M, Hallam KT, McGorry PD (2007) The potential utility of a staging model as a course specifier: a bipolar disorder perspective. *J Affect Disord* 100: 279–281. PMID: [17433450](https://pubmed.ncbi.nlm.nih.gov/17433450/)
  20. Berk M, Hallam K, Malhi GS, Henry L, Hasty M, et al. (2010) Evidence and implications for early intervention in bipolar disorder. *J Ment Health* 19: 113–126. doi: [10.3109/09638230903469111](https://doi.org/10.3109/09638230903469111) PMID: [20433320](https://pubmed.ncbi.nlm.nih.gov/20433320/)

21. Understanding the new NHS (2014). NHS England. Available: <http://www.england.nhs.uk/wp-content/uploads/2014/06/simple-nhs-guide.pdf>.
22. Stewart R, Soremekun M, Perera G, Broadbent M, Callard F, et al. (2009) The South London and Maudsley NHS Foundation Trust Biomedical Research Centre (SLAM BRC) case register: development and descriptive data. *BMC Psychiatry* 9: 51. Available: <http://www.biomedcentral.com/1471-244X/9/51>. doi: [10.1186/1471-244X-9-51](https://doi.org/10.1186/1471-244X-9-51) PMID: [19674459](https://pubmed.ncbi.nlm.nih.gov/19674459/)
23. Fernandes AC, Cloete D, Broadbent MTM, Hayes RD, Chang C- K, et al. (2013) Development and evaluation of a de-identification procedure for a case register sourced from mental health electronic records. *BMC Med Inform Decis Mak* 13: 71. doi: [10.1186/1472-6947-13-71](https://doi.org/10.1186/1472-6947-13-71) PMID: [23842533](https://pubmed.ncbi.nlm.nih.gov/23842533/)
24. Chang C-K, Hayes R, Broadbent M, Fernandes A, Lee W, et al. (2010) All-cause mortality among people with serious mental illness (SMI), substance use disorders, and depressive disorders in southeast London: a cohort study. *BMC Psychiatry* 10: 77. doi: [10.1186/1471-244X-10-77](https://doi.org/10.1186/1471-244X-10-77) PMID: [20920287](https://pubmed.ncbi.nlm.nih.gov/20920287/)
25. Hayes RD, Chang C- K, Fernandes AC, Begum A, To D, et al. (2012) Functional Status and All-Cause Mortality in Serious Mental Illness. *PLoS One* 7: e44613. Available: <http://dx.doi.org/10.1371/journal.pone.0044613>. doi: [10.1371/journal.pone.0044613](https://doi.org/10.1371/journal.pone.0044613) PMID: [22970266](https://pubmed.ncbi.nlm.nih.gov/22970266/)
26. Gorrell G, Jackson R, Roberts A, Stewart R (2013) Finding Negative Symptoms of Schizophrenia in Patient Records. *Proc NLP Med Biol Work (NLPMedBio)*, Recent Adv Nat Lang Process (RANLP), Hissar, Bulg: 9–17. Available: <http://aclweb.org/anthology/W/W13/W13-5102.pdf>.
27. Goodwin GM, Psychopharmacology CG of the BA for (2009) Evidence-based guidelines for treating bipolar disorder: revised second edition—recommendations from the British Association for Psychopharmacology. *J Psychopharmacol* 23: 346–388. Available: <http://jop.sagepub.com/content/23/4/346.abstract>. doi: [10.1177/0269881109102919](https://doi.org/10.1177/0269881109102919) PMID: [19329543](https://pubmed.ncbi.nlm.nih.gov/19329543/)
28. StataCorp (2011) Stata Statistical Software: Release 12. Coll Station TX StataCorp LP.
29. Integrating mental health into primary care: a global perspective (2008). World Health Organization.
30. KR M, Herrell R, Swendsen J, Rössler W, Ajdacic-Gross V, et al. (2008) Specificity of bipolar spectrum conditions in the comorbidity of mood and substance use disorders: Results from the zurich cohort study. *Arch Gen Psychiatry* 65: 47–52. Available: <http://dx.doi.org/10.1001/archgenpsychiatry.2007.18>. doi: [10.1001/archgenpsychiatry.2007.18](https://doi.org/10.1001/archgenpsychiatry.2007.18) PMID: [18180428](https://pubmed.ncbi.nlm.nih.gov/18180428/)
31. Goldstein BI, Bukstein OG (2010) Comorbid substance use disorders among youth with bipolar disorder: opportunities for early identification and prevention. *J Clin Psychiatry* 71: 348–358. doi: [10.4088/JCP.09r05222gry](https://doi.org/10.4088/JCP.09r05222gry) PMID: [19961811](https://pubmed.ncbi.nlm.nih.gov/19961811/)
32. Pettinati HM, O'Brien CP, Dundon WD (2013) Current status of co-occurring mood and substance use disorders: a new therapeutic target. *Am J Psychiatry* 170: 23–30. doi: [10.1176/appi.ajp.2012.12010112](https://doi.org/10.1176/appi.ajp.2012.12010112) PMID: [23223834](https://pubmed.ncbi.nlm.nih.gov/23223834/)
33. Pilling S, Yesufu-Udechuku A, Taylor C, Drummond C (2011) Diagnosis, assessment, and management of harmful drinking and alcohol dependence: summary of NICE guidance. *BMJ* 342.
34. National Institute for Health and Care Excellence (2016) Severe mental illness and substance misuse (dual diagnosis)—community health and social care services. Available: <https://www.nice.org.uk/guidance/indevelopment/gid-phg87>.
35. Smith DJ, Griffiths E, Kelly M, Hood K, Craddock N, et al. (2011) Unrecognised bipolar disorder in primary care patients with depression. *Br J Psychiatry* 199: 49–56. Available: <http://bjp.rcpsych.org/content/199/1/49.abstract>. doi: [10.1192/bjp.bp.110.083840](https://doi.org/10.1192/bjp.bp.110.083840) PMID: [21292927](https://pubmed.ncbi.nlm.nih.gov/21292927/)
36. Wing JK, Babor T, Brugha T, Burke J, Cooper JE, et al. (1990) SCAN: Schedules for Clinical Assessment in Neuropsychiatry. *JAMA Psychiatry* 47: 589–593. PMID: [2190539](https://pubmed.ncbi.nlm.nih.gov/2190539/)
37. Young RC, Biggs JT, Ziegler VE, Meyer DA (1978) A rating scale for mania: reliability, validity and sensitivity. *Br J Psychiatry* 133: 429–435. PMID: [728692](https://pubmed.ncbi.nlm.nih.gov/728692/)
38. Bauer MS, Altshuler L, Evans DR, Beresford T, Williford WO, et al. (2005) Prevalence and distinct correlates of anxiety, substance, and combined comorbidity in a multi-site public sector sample with bipolar disorder. *J Affect Disord* 85: 301–315. PMID: [15780700](https://pubmed.ncbi.nlm.nih.gov/15780700/)
39. Peralta V, Cuesta MJ, Martinez-Larrea A, Serrano JF, Langarica M (2005) Duration of untreated psychotic illness. *Soc Psychiatry Psychiatr Epidemiol* 40: 345–349. PMID: [15902404](https://pubmed.ncbi.nlm.nih.gov/15902404/)
40. McCraw S, Parker G, Graham R, Synnott H, Mitchell PB (2014) The duration of undiagnosed bipolar disorder: Effect on outcomes and treatment response. *J Affect Disord* 168: 422–429. doi: [10.1016/j.jad.2014.07.025](https://doi.org/10.1016/j.jad.2014.07.025) PMID: [25108774](https://pubmed.ncbi.nlm.nih.gov/25108774/)
